# Supplementary material for: Hepatocyte Growth Factor (HGF) Promotes Peripheral Nerve Regeneration by Activating Repair Schwann Cells
Source: PubMed Central journal article supplement (PMC5973939; doi:10.1038/s41598-018-26704-x), 2018-05-29
Supplement: 41598_2018_26704_MOESM1_ESM.pdf [file 41598_2018_26704_MOESM1_ESM.pdf]

**Hepatocyte Growth Factor (HGF) Promotes Peripheral Nerve Regeneration  
by Activating Repair Schwann Cells**

Kyeong Ryang Ko<sup>1,2</sup>, Junghun Lee<sup>2</sup>, Deokho Lee<sup>2</sup>, Boram Nho<sup>1</sup> and Sunyoung Kim<sup>1,2\*</sup>

<sup>1</sup>School of Biological Sciences, Seoul National University, Seoul 08826, Korea,

<sup>2</sup>ViroMed, Co., Ltd, Seoul 08826, Korea

\* Correspondence should be addressed to Sunyoung Kim ([sunyoung@snu.ac.kr](mailto:sunyoung@snu.ac.kr))

Corresponding author's

Address: 504-208, School of Biological Sciences, Seoul National University, Seoul 08826, Korea

Telephone: +82-2-880-7529

Fax: +82-2-875-0907

Email: [sunyoung@snu.ac.kr](mailto:sunyoung@snu.ac.kr)

Short title: The role of HGF in peripheral nerve regeneration

# Supplementary Figure S1

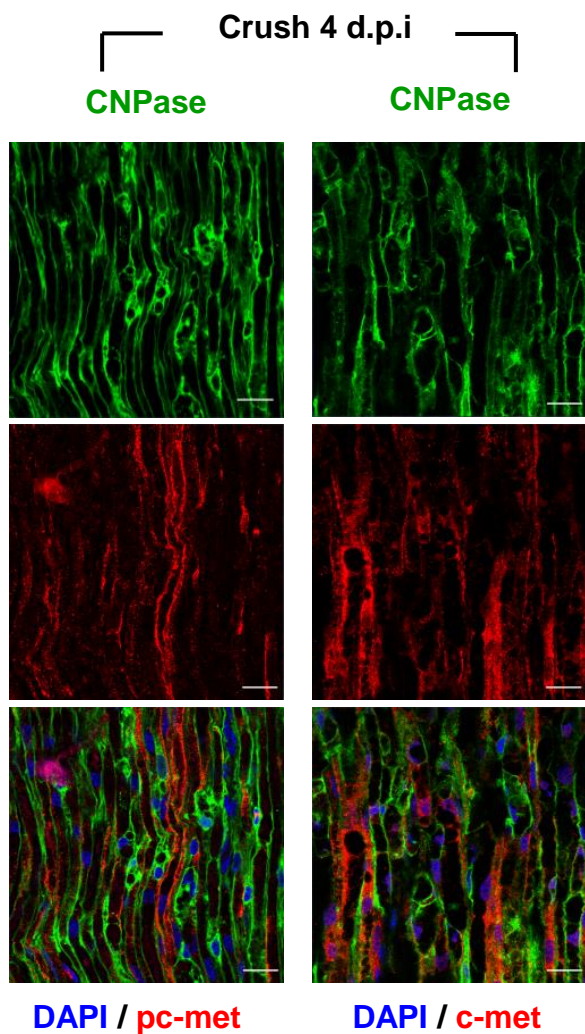

**Supplementary Figure S1. Identification of cell types expressing c-met.** The distal sites of injured sciatic nerves were analyzed by IHC using antibodies to CNPase (green), phosphorylated c-met and total c-met (red). Injured sciatic nerves were prepared at crush 4 d.p.i. Nuclei were counterstained with Hoechst (blue). n = 3 for each group. Scale bar = 20 $\mu$ m

## Supplementary Figure S2

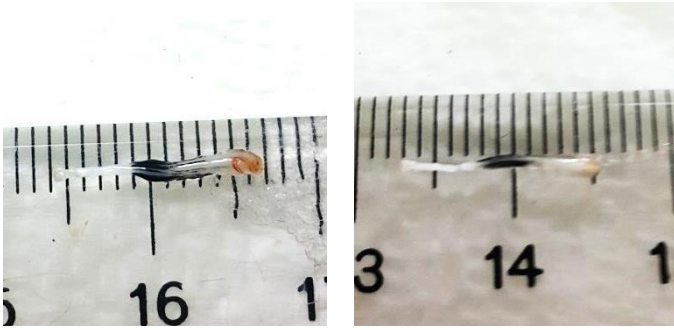

**Supplementary Figure S2. Identification of the injury site of sciatic nerve.** The injury sites of sciatic nerves were marked by powdered carbon.

## Supplementary Figure S3

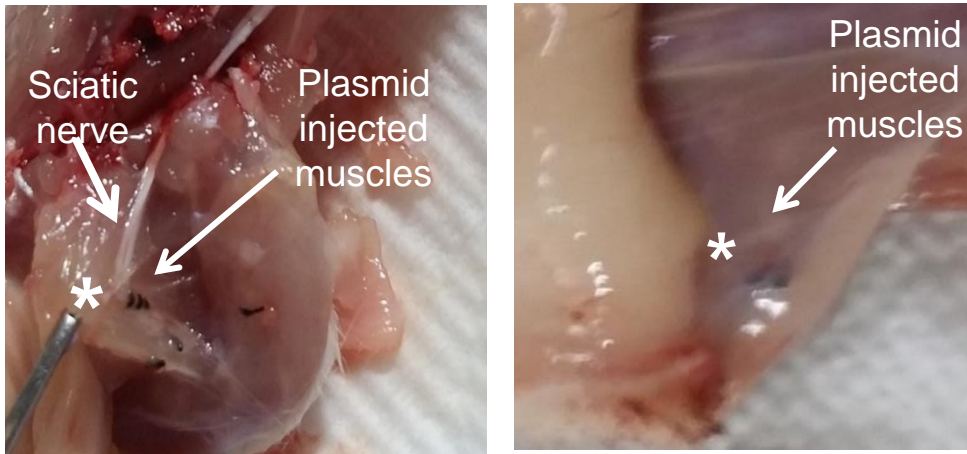

**Supplementary Figure S3. Injection site of plasmid DNA.** After nerve crush model was introduced, 200 $\mu$ g of plasmid DNA diluted in 100 $\mu$ l of PBS was injected to thigh muscles around the sciatic nerves. White Asterisk (\*) indicated the injection site.

# Supplementary Figure S4

(A)

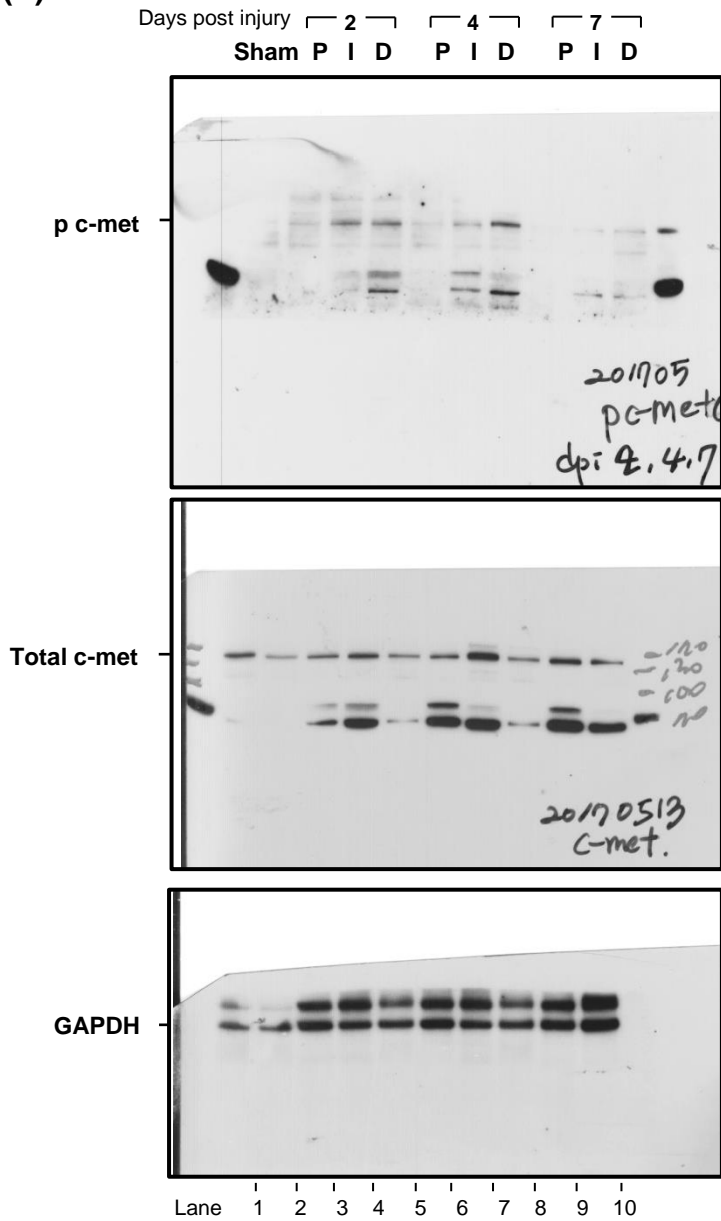

# Supplementary Figure S4

(B)

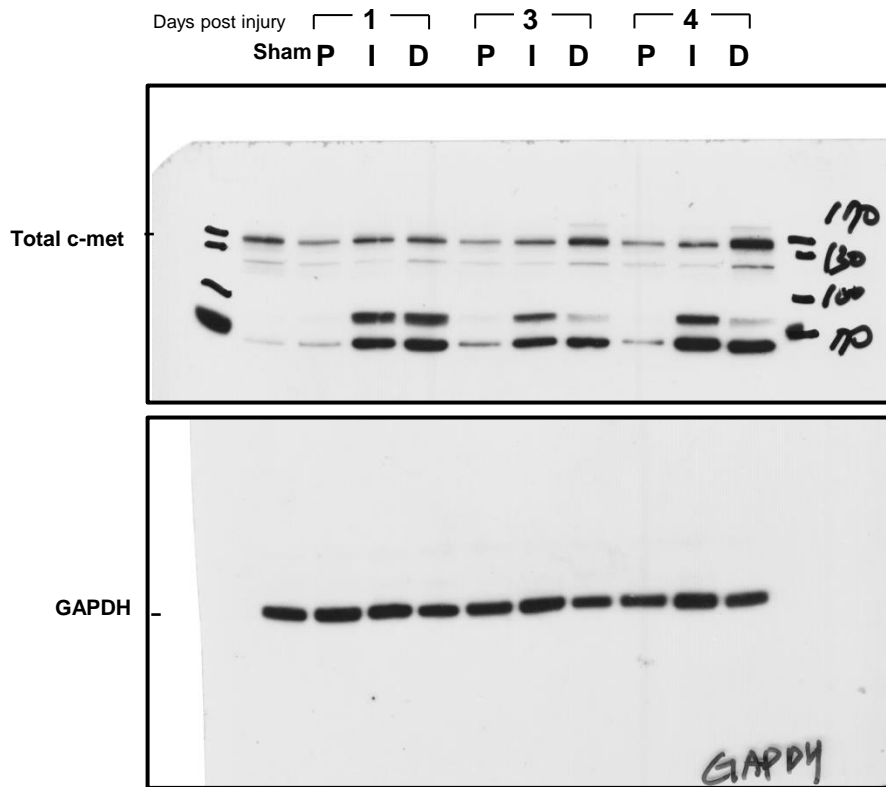

**Supplementary Figure S4. Full representative Western blots.** (A) Full Western blot for Figure 2A and 2B. (B) Full Western blot for Figure 2B.

# Supplementary Figure S5

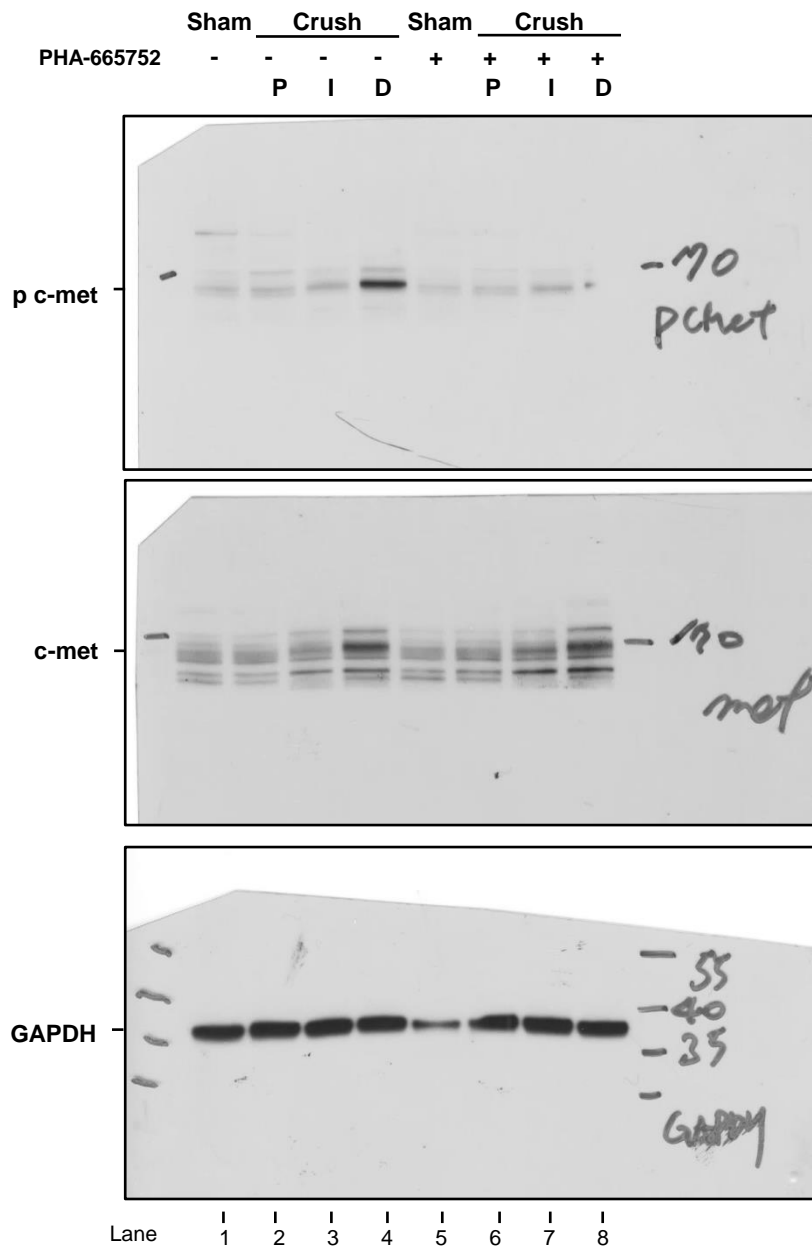

**Supplementary Figure S5. Full representative Western blots.** Full Western blot for Figure 4A.

# Supplementary Figure S6

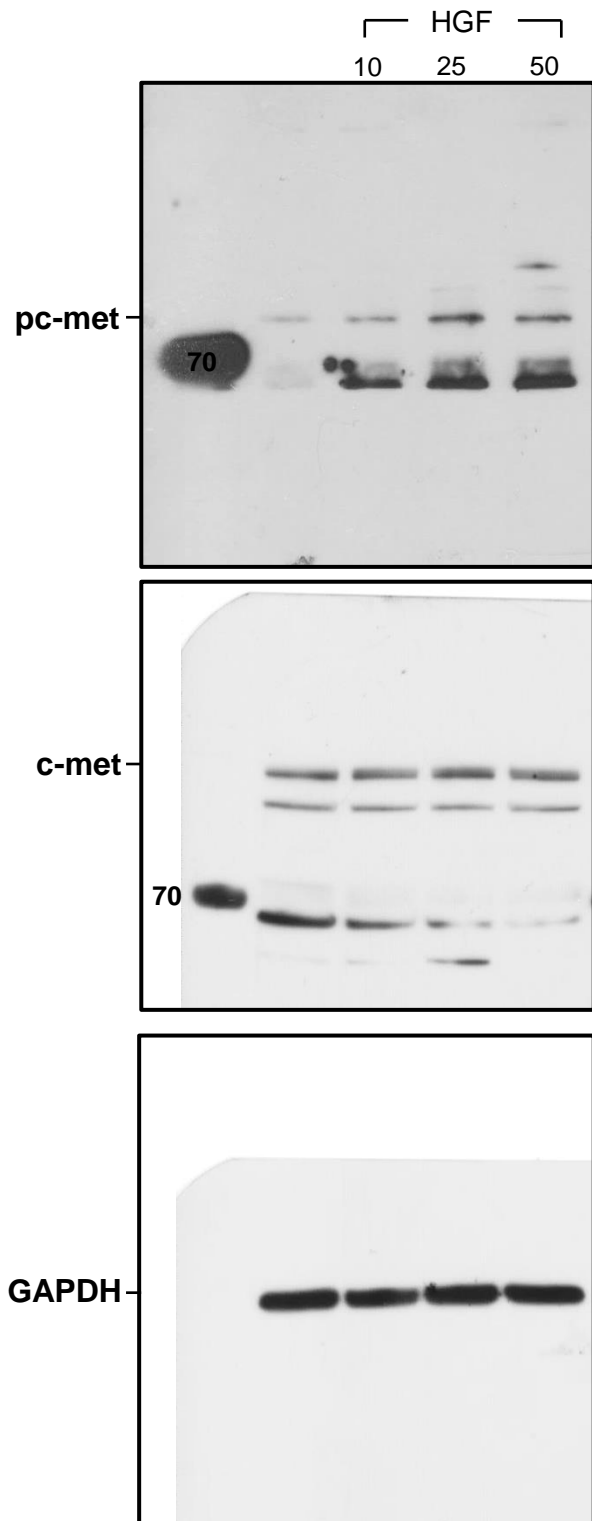

**Supplementary Figure S6. Full representative Western blots.** Full Western blot for Figure 5A.



# Supplementary Figure S7

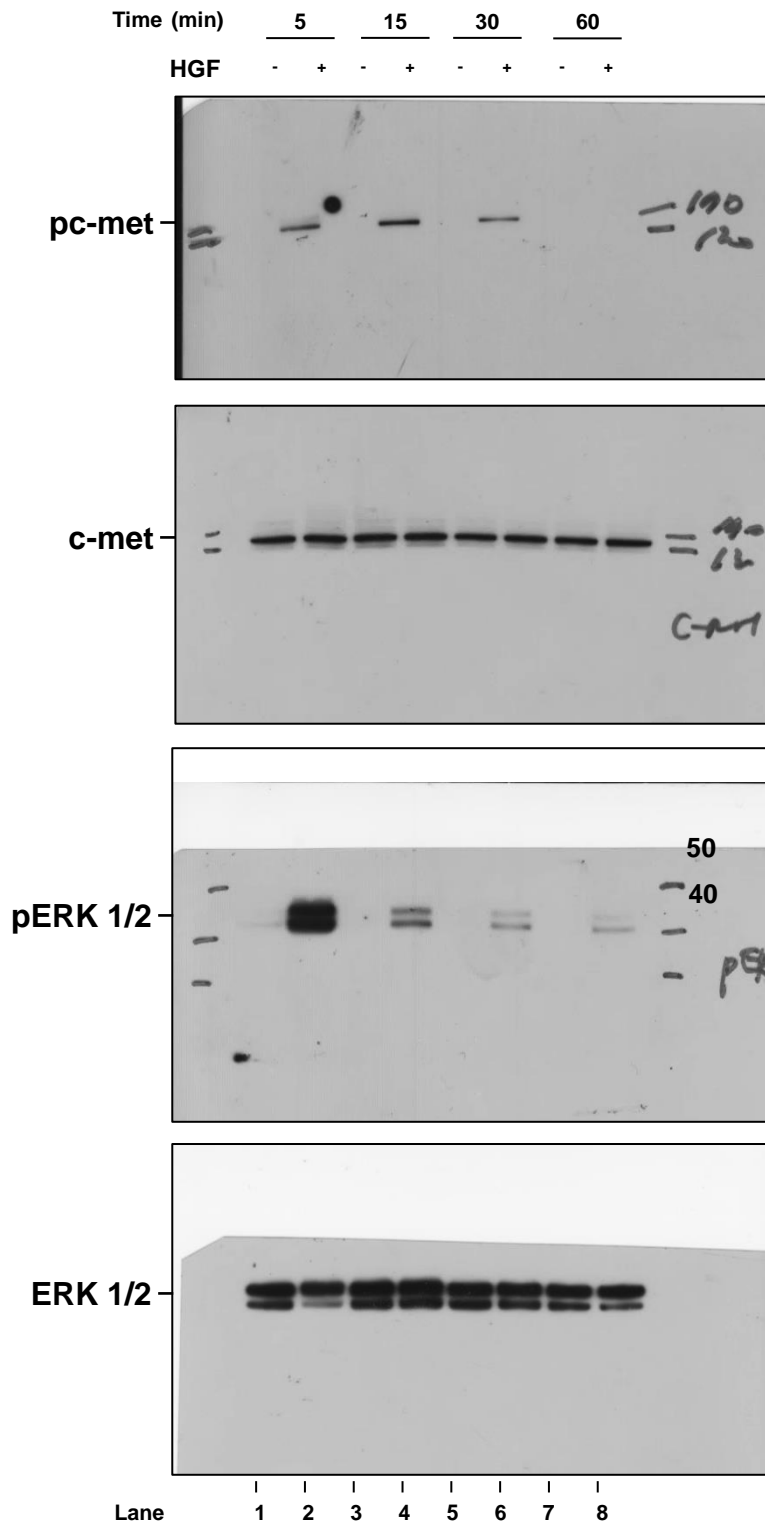

# Supplementary Figure S7

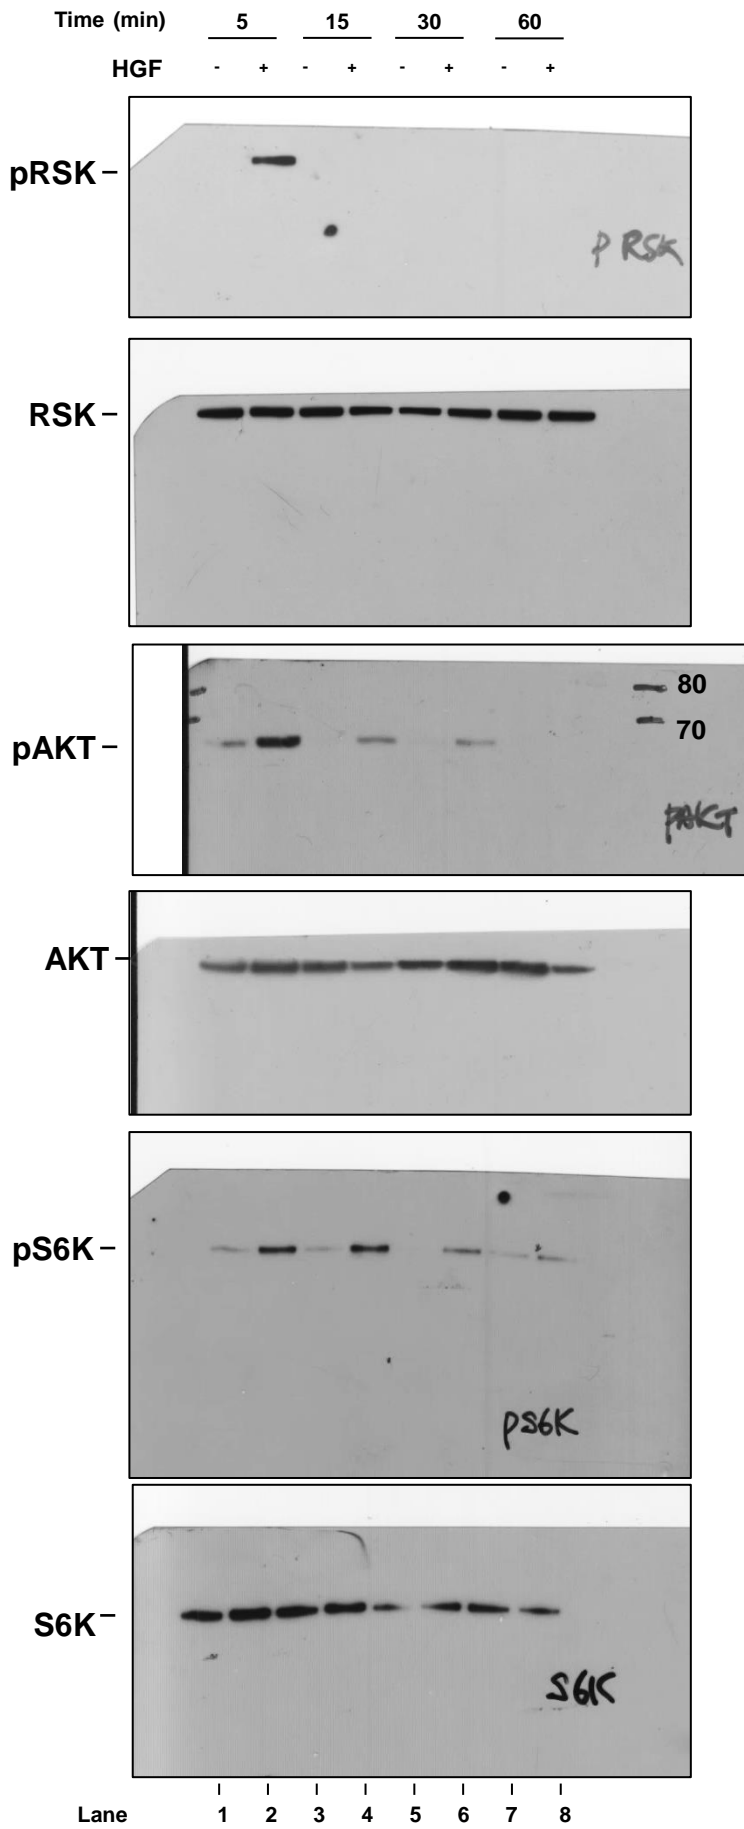

# Supplementary Figure S7

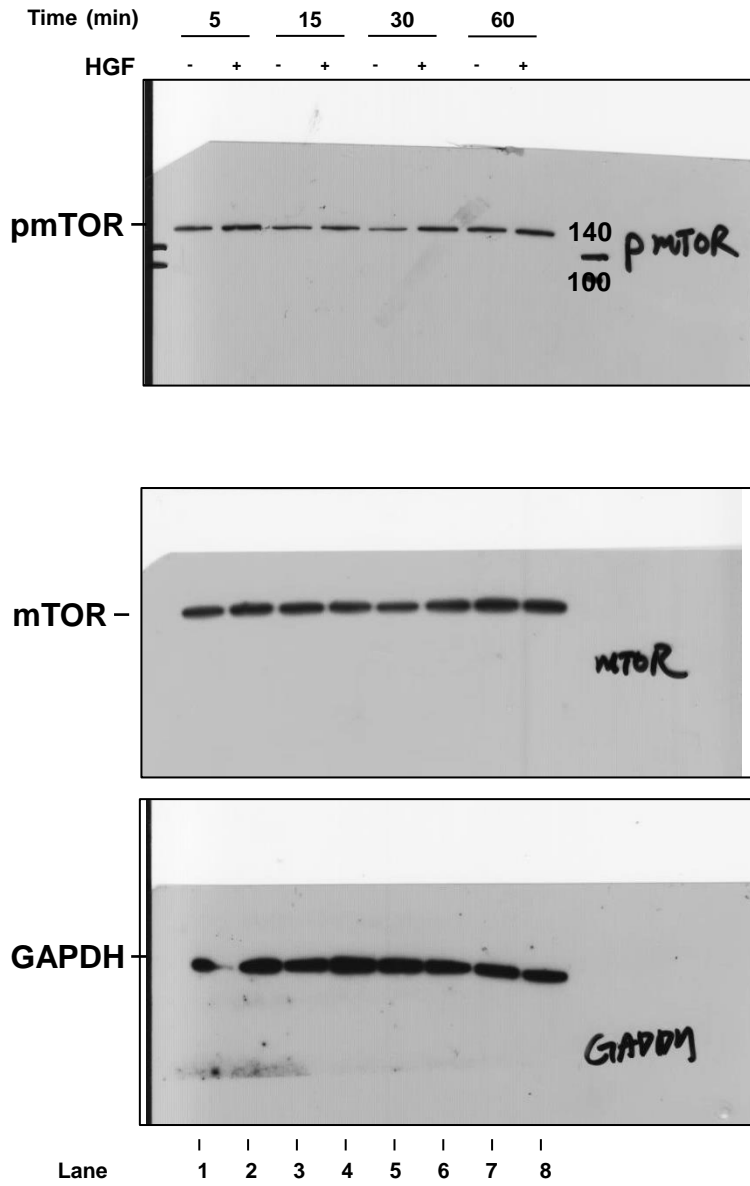

**Supplementary Figure S7. Full representative Western blots.** Full Western blot for Figure 5E.
